# Supplementary material for: Synergistic Interaction between Copper and Nitrogen-Uptake, Translocation, and Distribution in Rice Plant
Source: MDPI journal article supplement (doi:10.3390/plants11192612), 2022-10-04
Supplement: s1 [file s1]

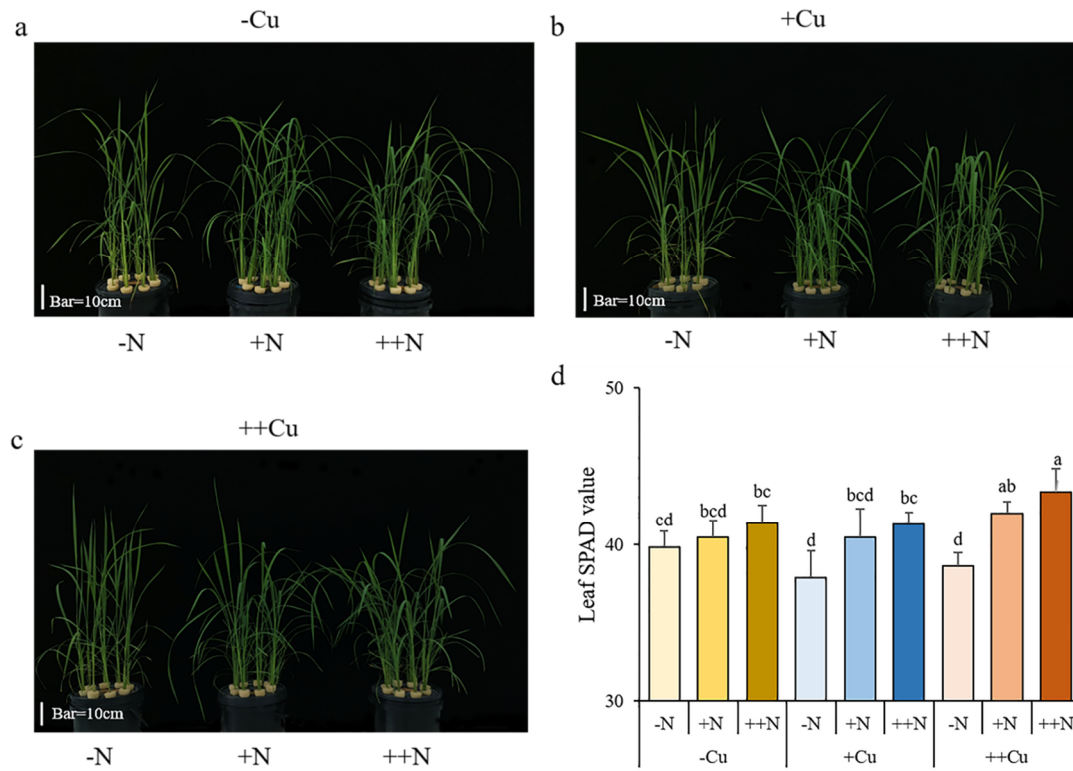

**Figure S1.** Growth phenotype (a–c) and leaf SPAD value (d) of rice plant grown in solutions with different combinations of Cu (-Cu, 0  $\mu\text{M}$ ; +Cu, 0.15  $\mu\text{M}$ ; ++Cu, 1.5  $\mu\text{M}$ ) and N (-N, 0.288 mM; +N, 2.88 mM; ++N, 14.4 mM) supply for three weeks. Data are means  $\pm$ SD of three biological replicates. Different letters indicate significant difference at  $p < 0.05$  by Tukey's test.

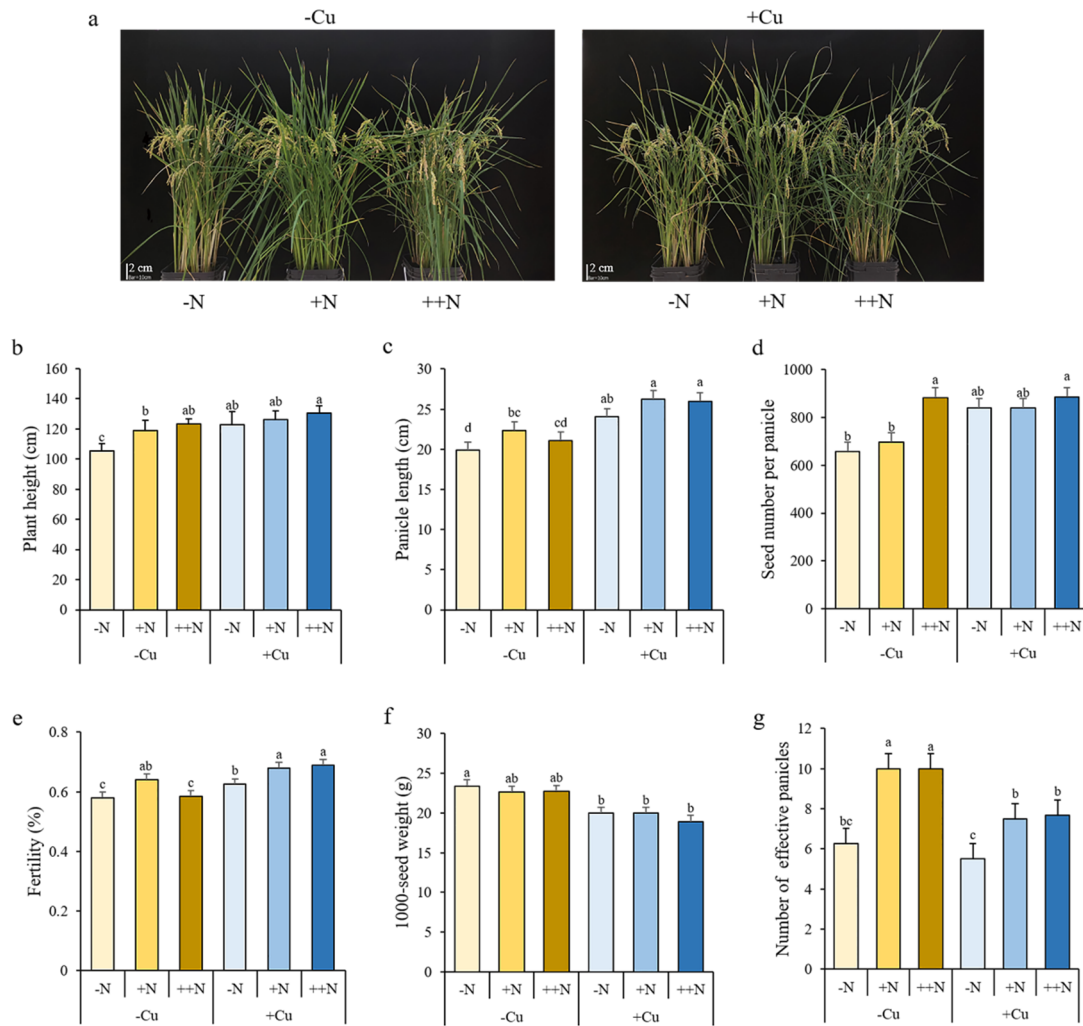

**Figure S2.** Growth phenotype (**a**) and yield components (**b–g**; **b**, plant height; **c**, panicle length; **d**, seed number per panicle; **e**, fertility; **f**, 1000-seed weight; **g**, number of effective panicles) of rice plant grown in soil with different combinations of Cu (-Cu, 0 mg Cu kg<sup>-1</sup> soil; +Cu, 50 mg Cu kg<sup>-1</sup> soil) and N (-N, 0 g N kg<sup>-1</sup> soil; +N, 0.2 g N kg<sup>-1</sup> soil; ++N, 0.4 g N kg<sup>-1</sup> soil) supply at mature stage. Data are means  $\pm$ SD of three biological replicates. Different letters indicate significant difference at  $p < 0.05$  by Tukey's test.

**Table S1.** Primers used in qRT-PCR.

| Gene Name           | Primer Name        | Primer Sequence (5' to 3') |
|---------------------|--------------------|----------------------------|
| <i>OsUbiquitin</i>  | OsUbiquitin-F      | GACGGACGCACCCCTGGCTGA      |
|                     | OsUbiquitin-R      | TGCTGCCAATTACCATATACC      |
| <i>OsAMT1.1</i>     | OsAMT1.1-RT-F      | ACCAATCCAGAACGAACGAC       |
|                     | OsAMT1.1-RT-R      | AGCCCAGCAAAAGTGAAAGA       |
| <i>OsAMT1.2</i>     | OsAMT1.2-RT-F      | CTTCATCGGGAAGCAGTTCT       |
|                     | OsAMT1.2-RT-R      | TGAGGAAGGCGGAGTAGATG       |
| <i>OsAMT1.3</i>     | OsAMT1.3-RT-F      | GCGTGGGGGATCATCTTCAC       |
|                     | OsAMT1.3-RT-R      | GAACCTGTGCAGCACGTAGA       |
| <i>OsAMT2.1</i>     | OsAMT2.1-RT-F      | GCGTTCGTGATCGCGTGGA        |
|                     | OsAMT2.1-RT-R      | TAGAGCTGGATGGTGACGC        |
| <i>OsAMT2.3</i>     | OsAMT2.3-RT-F      | TCACCATTCAAGTTGTAGAAGACGG  |
|                     | OsAMT2.3-RT-R      | CTACACCAGCATTACATCACCGAA   |
| <i>OsAMT3.1</i>     | OsAMT3.1-RT-F      | CTTCATCATCTGCTGGAACGTG     |
|                     | OsAMT3.1-RT-R      | TTGTTGTTGTGGTGCGTGTC       |
| <i>OsAMT3.2</i>     | OsAMT3.2-RT-F      | CTCACCTTCTCCTACACCGTC      |
|                     | OsAMT3.2-RT-R      | ACCCCATCCATAGTAACCCTG      |
| <i>OsAMT3.3</i>     | OsAMT3.3-RT-F      | CGAGCATCACCATCATCATC       |
|                     | OsAMT3.3-RT-R      | ATGACACCCCACTGGAAGAG       |
| <i>OsNRT1.1A</i>    | OsNRT1.1A-RT-F     | CCCACACCAAGCAATTCAGG       |
|                     | OsNRT1.1A-RT-R     | GTCTTCACCTCCTCCACGTC       |
| <i>OsNRT1.1B</i>    | OsNRT1.1B-RT-F     | CAACCTGGTGCCGTACATGA       |
|                     | OsNRT1.1B-RT-R     | TCGTGAGTATCATCACGCCG       |
| <i>OsNRT2.1</i>     | OsNRT2.1-RT-F      | CACGGTGCAAGTCTCAAG         |
|                     | OsNRT2.1-RT-R      | GGTATAAATGCCTCTCCC         |
| <i>OsNRT2.2</i>     | OsNRT2.2-RT-F      | CGGAGCACGCCTAATTAAGAG      |
|                     | OsNRT2.2-RT-R      | CTCCATGACGACATACTCTAGATA   |
| <i>OsNRT2.3a</i>    | OsNRT2.3a-RT-F     | CGCTGCTGCCGCTCATCCG        |
|                     | OsNRT2.3a-RT-R     | CCGTGCCCATGGCCAGAC         |
| <i>OsNRT2.4</i>     | OsNRT2.4-RT-F      | AAAGGTCGCTGGGCGTGCTG       |
|                     | OsNRT2.4-RT-R      | CCTGGACCCGCTGAAGAAGAG      |
| <i>OsNR1</i>        | OsNR1-RT-F         | TACCAGGTCATCCAGTCGGT       |
|                     | OsNR1-RT-R         | GTAATTCACCCCTTCTCCG        |
| <i>OsNR2</i>        | OsNR2-RT-F         | CAAGGTGTGGTACGTGGTGA       |
|                     | OsNR2-RT-R         | GCAGGACTTGTGAGGTCAT        |
| <i>OsNiR1</i>       | OsNiR1-RT-F        | CTGCCTACCAAGGACAG          |
|                     | OsNiR1-RT-R        | TTCCTACTCCTCGTCCTCCT       |
| <i>OsNiR2</i>       | OsNiR2-RT-F        | GAACGAGGAGTAGGAGCACA       |
|                     | OsNiR2-RT-R        | GGGCTACAAGATCAAACCAA       |
| <i>OsGS1.1</i>      | OsGS1.1-RT-F       | TGGGTTGCTCGCTACATTCT       |
|                     | OsGS1.1-RT-R       | GCTTGAGCTTCTCAATGGCG       |
| <i>OsGS1.2</i>      | OsGS1.2-RT-F       | TGCTGACCAAGTGTGGGTTG       |
|                     | OsGS1.2-RT-R       | GAGCTTGTGATCGCCTTCT        |
| <i>OsGS2</i>        | OsGS2-RT-F         | TTTCTCATGGGGTGTGGCAA       |
|                     | OsGS2-RT-R         | GGGCCAACTTCTTAGCAGCA       |
| <i>OsFd-GOGAT</i>   | OsFd-GOGAT1-RT-F   | CGGGTGGCCTTGCCTATATT       |
|                     | OsFd-GOGAT1-RT-R   | ACCAGTTGCCAGAAGAGTGG       |
| <i>OsNADH-GOGAT</i> | OsNADH-GOGAT2-RT-F | CCTGTCGAAGGATGATGAAGGTGA   |
|                     | OsNADH-GOGAT2-RT-R | A                          |
| <i>OsCOPT1</i>      | OsCOPT1-RT-F       | TGCATGGCCCTACTATCTTCGCATCA |
|                     | OsCOPT1-RT-R       | TTGCAGCCTGGAGAAAACAC       |

|                |              |                       |
|----------------|--------------|-----------------------|
|                | OsCOPT1-RT-R | TCCACTTCACAGTCCGTCTC  |
| <i>OsCOPT3</i> | OsCOPT3F     | GCTCGCCGTCATGTCCTTCA  |
|                | OsCOPT3R     | TCTGACGATGGATGGAGAGA  |
| <i>OsCOPT5</i> | OsCOPT5-RT-F | CGCGATCCTCTTCATGTTCCG |
|                | OsCOPT5-RT-R | CGCGAGCATGATGAGGTATG  |
| <i>OsCOPT7</i> | OsCOPT7F     | CCGCCTTCTACCAGTACCTC  |
|                | OsCOPT7R     | CATGAGGAGGTAGCCCAGG   |
| <i>OsHMA5</i>  | OsHMA5-RT-F  | GAGAGCTTCTGTGCGCATTGG |
|                | OsHMA5-RT-R  | TGCCATCCACTTTGAGGTCT  |
| <i>OsHMA9</i>  | OsHMA9-RT-F  | TGCTATCTCTCAGCCAAAGG  |
|                | OsHMA9-RT-R  | CTAGTGAGGTTGCTAAGGCA  |
| <i>OsYSL16</i> | OsYSL16-RT-F | GTGGATTCTGGGTCGTTCTTG |
|                | OsYSL16-RT-R | GTCGATGACCAGCACCTTTC  |
| <i>OsATX1</i>  | OsATX1-RT-F  | TTACACCAGATGCCGTTCTTC |
|                | OsATX1-RT-R  | AGCAGCAGTAGCTTCAACAG  |
